# Supplementary material for: Digital Interventions to Support Adolescents and Young Adults With Cancer: Systematic Review
Source: PubMed Central journal article supplement (PMC6693302; doi:10.2196/12071), 2019-07-31
Supplement: cancer_v5i2e12071_app2.pdf [file cancer_v5i2e12071_app2.pdf]

**A Summary of Research Studies Included in the Review**

| Author (Year)<br>Country<br>Intervention Name                  | Sample Size                 | Age Range (years)<br><br>Mean/<br>Median Age (years) | Key Target Behaviour               | Intervention Platform                            | Outcome Measure(s)                                                                                                                                                                                               | QualSyst Score (%) |
|----------------------------------------------------------------|-----------------------------|------------------------------------------------------|------------------------------------|--------------------------------------------------|------------------------------------------------------------------------------------------------------------------------------------------------------------------------------------------------------------------|--------------------|
| <b>Randomised Controlled Trials</b>                            |                             |                                                      |                                    |                                                  |                                                                                                                                                                                                                  |                    |
| Sabel et al., 2016<br><br>Not Reported<br><br>Not Reported     | N =13                       | 7-17<br><br>Mean age:<br>12.5±2.9                    | Physical Activity                  | Nintendo Wii                                     | Physical Activity Levels<br><br>Physical Functioning                                                                                                                                                             | 96                 |
| Mendoza et al., 2017<br><br>USA<br><br>Not Reported            | N =59                       | 14-18<br><br>Mean age:<br>16.6±1.5                   | Physical Activity                  | Fitbit Flex<br><br>Facebook Support Group        | Feasibility<br><br>Physical Activity<br><br>Quality of Life<br><br>Motivation<br><br>Facebook Engagement                                                                                                         | 62                 |
| Kunin-Batson et al., 2016<br><br>USA<br><br>Not Reported       | N =52                       | 15-28<br><br>Mean age:<br>21.3±3.9                   | Cancer Knowledge and Understanding | Website<br><br>e-Journal<br><br>Messaging System | Cancer Knowledge<br><br>Anxiety<br><br>Multidimensional Health Locus of Control                                                                                                                                  | 65                 |
| Jones et al., 2010<br><br>USA<br><br>Conquering Cancer Network | N =65<br><br>I =35<br>C =30 | 12-18<br><br>Mean age:<br>14.8±1.96                  | Education                          | CD-ROM                                           | Frequency and Duration of Use<br><br>Multidimensional Health Locus of Control<br><br>Quality of Life<br><br>Self-Efficacy<br><br>Avoidance<br><br>Coping Strategies<br><br>Approach Help<br><br>Cancer Knowledge | 69                 |

## Multimedia Appendix 2

| Author (Year)<br>Country<br>Intervention Name                                 | Sample Size                | Age Range (years)<br>Mean/<br>Median Age (years) | Key Target Behaviour                       | Intervention Platform   | Outcome Measure(s)                                                                                                                     | QualSyst Score (%) |
|-------------------------------------------------------------------------------|----------------------------|--------------------------------------------------|--------------------------------------------|-------------------------|----------------------------------------------------------------------------------------------------------------------------------------|--------------------|
| Akard et al., 2015<br>Not Reported<br>Not Reported                            | N =28                      | 7-17<br>Mean age:<br>Parents =36<br>Children =11 | Symptom Management<br>Quality of Life      | Digital Story Telling   | PedsQL V4.0                                                                                                                            | 81                 |
| Beale et al., 2007; Kato et al., 2008<br>USA, Canada, Australia<br>Re-Mission | N =375<br>I =197<br>C =178 | 13-29<br>Mean age:<br>I =15.79<br>C =16.06       | Cancer Knowledge<br>Adherence to Treatment | Video Game (Re-Mission) | Treatment Adherence<br>Self-Efficacy<br>Cancer Knowledge<br>Perceived Stress<br>Health Locus Control<br>Quality of Life<br>FACT-G      | 81, 100            |
| Burns et al., 2009<br>USA<br>SMART Study                                      | N =12                      | 11-24<br>Mean age:<br>17.5                       | Building Resilience                        | Therapeutic Music Video | Feasibility<br>Symptom Experience<br>Symptom Related Risk<br>Individual Risk<br>Individual Protective<br>Resilience<br>Quality of Life | 73                 |
| Emmons et al., 2013<br>USA, Canada                                            | N =374<br>I =132<br>C =242 | 18-55<br>Mean age:<br>32±7.9                     | Smoking Cessation                          | Website                 | Smoking Cessation<br>Quit Attempts                                                                                                     | 92                 |

## Multimedia Appendix 2

| Author (Year)<br>Country<br>Intervention Name                         | Sample Size             | Age Range (years)<br>Mean/<br>Median Age (years) | Key Target Behaviour | Intervention Platform | Outcome Measure(s)                                                       | QualSyst Score (%) |
|-----------------------------------------------------------------------|-------------------------|--------------------------------------------------|----------------------|-----------------------|--------------------------------------------------------------------------|--------------------|
| PFH-2                                                                 |                         |                                                  |                      |                       | Readiness to Change                                                      |                    |
| Huang et al., 2014<br>USA<br>Fit4Life                                 | N =38                   | 10-16<br>Median age: 13                          | Obesity Treatment    | Website<br>SMS        | Weight<br>BMI-Z<br>Physical Activity<br>Diet<br>Psychological Behaviours | 79                 |
| Rabin et al., 2011<br>USA<br>Not Reported                             | N =18                   | 18-39<br>Mean age: 32.17                         | Physical Activity    | Website               | Feasibility and Acceptability<br>Physical Activity<br>POMS<br>Fatigue    | 46                 |
| Valle et al., 2013; Valle et al., 2015<br>USA<br>Not Reported         | N =86                   | 21-29<br>Mean age: 31.7                          | Physical Activity    | Facebook              | Physical Activity<br>BMI<br>FACT-G                                       | 68,58              |
| <b>Non-Randomised Controlled Trials</b>                               |                         |                                                  |                      |                       |                                                                          |                    |
| Wint et al., 2002<br>USA<br>VR Glasses                                | N =30<br>I =17<br>C =13 | 10-19<br>Mean age: 13.6                          | Pain                 | VR Glasses            | Pain<br>VR Evaluation                                                    | 71                 |
| <b>Single-Group Repeated Measures</b>                                 |                         |                                                  |                      |                       |                                                                          |                    |
| Seitz et al., 2014a; Seitz et al., 2014b<br>Not Reported<br>Onco-STEP | N =20                   | 20-36<br>Mean age: 27.3±4.8                      | PTSD                 | Website               | Intervention Satisfaction<br>PTSF Symptoms<br>Anxiety<br>Depression      | 85, 85             |

## Multimedia Appendix 2

| Author (Year)<br>Country<br>Intervention Name                | Sample Size | Age Range (years)<br><br>Mean/<br>Median Age (years) | Key Target Behaviour                                | Intervention Platform | Outcome Measure(s)                                                                                                    | QualSyst Score (%) |
|--------------------------------------------------------------|-------------|------------------------------------------------------|-----------------------------------------------------|-----------------------|-----------------------------------------------------------------------------------------------------------------------|--------------------|
|                                                              |             |                                                      |                                                     |                       | Fear                                                                                                                  |                    |
| Hardy et al., 2011<br>USA<br>Captain's Log                   | N =9        | 10-17<br><br>Mean age: 13.3±2.4                      | Memory<br><br>Attention<br><br>Behavioural Function | Game                  | Feasibility<br><br>Working Memory Index<br><br>Digit Span<br><br>Letter Numbering Sequencing<br><br>Inattention Index | 50                 |
| Gilliam et al., 2011<br>USA<br>Not Reported                  | N =12       | 6-18<br><br>Mean age: 12.75                          | Physical Function<br><br>Quality of Life            | Website               | Adherence<br><br>Endurance<br><br>Strength<br><br>Functional Mobility<br><br>Quality of Life                          | 73                 |
| Berg et al., 2014<br>USA<br>Not Reported                     | N =24       | 18-34<br><br>Mean age: 23.38                         | Health Promotion Behaviours                         | e-Mail                | Intervention Acceptability and Feasibility                                                                            | 77                 |
| Baggott et al., 2012<br>USA<br>mOST                          | N =11       | 13-21<br><br>Mean age: 18.2±2.9                      | Symptom Management                                  | App                   | Feasibility<br><br>Adherence                                                                                          | 94                 |
| Rodgers et al., 2013;<br>Rodgers et al., 2014<br>USA<br>EAT! | N =16       | 11-18                                                | Symptom Management                                  | App                   | Memorial Symptom Assessment Scale<br><br>Albumin<br><br>Prealbumin                                                    | 43                 |

## Multimedia Appendix 2

| Author (Year)<br>Country<br>Intervention Name                            | Sample Size                              | Age Range (years)<br><br>Mean/<br>Median Age (years)                        | Key Target Behaviour             | Intervention Platform | Outcome Measure(s)                             | QualSyst Score (%) |
|--------------------------------------------------------------------------|------------------------------------------|-----------------------------------------------------------------------------|----------------------------------|-----------------------|------------------------------------------------|--------------------|
|                                                                          |                                          |                                                                             |                                  |                       | Acceptability and Usability<br><br>Competency  |                    |
| Jibb et al., 2017; Stinson et al., 2013<br><br>Canada<br><br>Pain Squad+ | N =40                                    | 12-18<br><br>Mean age: 14.2±1.7                                             | Pain                             | App                   | Feasibility<br><br>Pain                        | 82, 80             |
| <b>Cross-Sectional, Single Group Studies</b>                             |                                          |                                                                             |                                  |                       |                                                |                    |
| Hooke et al., 2016<br><br>USA<br><br>FitBit                              | N =17                                    | 8-15<br><br>Mean age: 8.69                                                  | Physical Activity<br><br>Fatigue | FitBitR               | Validity and Reliability<br><br>Responsiveness | 68                 |
| Stinsen et al., 2015b<br><br>Canada<br><br>PainSquad                     | Study 1<br>N =92<br><br>Study 2<br>N =14 | 8-18<br><br>Mean age:<br><br>Study 1<br>13.1±2.9<br><br>Study 2<br>14.8±2.8 | Pain                             | App                   | Acceptability<br><br>Compliance                | 100                |
| Lai et al., 2015<br><br>USA<br><br>SyMon-SAYS                            | N =57                                    | 7-21<br><br>Mean age: 11.9                                                  | Fatigue                          | Website               | Feasibility<br><br>Acceptability               | 80                 |
| Knijnenburg et al., 2013<br><br>Netherlands<br><br>DCOG                  | N =98                                    | 17-55<br><br>Mean age: 31                                                   | Medical Decision Making          | Website               | Usability<br><br>Website Content               | 60                 |
| Kesler et al., 2011<br><br>USA                                           | N =25                                    | 7-19<br><br>Mean age: 12.6                                                  | Cognitive Function               | Computer Program      | Compliance<br><br>Cognitive Function           | 77                 |

## Multimedia Appendix 2

| Author (Year)<br>Country<br>Intervention Name    | Sample Size | Age Range (years)<br>Mean/<br>Median Age (years)   | Key Target Behaviour         | Intervention Platform | Outcome Measure(s)                                               | QualSyst Score (%) |
|--------------------------------------------------|-------------|----------------------------------------------------|------------------------------|-----------------------|------------------------------------------------------------------|--------------------|
| No Reported                                      |             |                                                    |                              |                       |                                                                  |                    |
| Wiklander et al., 2017<br>Sweden<br>Fex-Can      | N =23       | 18-43<br>Mean age: 30                              | Sexual Problems<br>Fertility | Website               | Demand<br>Acceptability<br>Preliminary Efficacy<br>Functionality | 80                 |
| Blaauwbroek et al., 2012<br>Netherlands<br>SCP   | N =73       | 19-56<br>Mean age: 38                              | Information Provision        | Website               | Website Evaluation                                               | 64                 |
| Cantrell and Conte, 2008<br>USA<br>HIP           | N =6        | 21-39<br>Mean age: Not Reported                    | Psychosocial Function        | Website               | Intervention Evaluation                                          | 35                 |
| Macpherson et al., 2014<br>USA<br>C-SCAT         | N =72       | 13-29<br>Median age:<br>Adolescent 15<br>Adults 22 | Symptom Management           | App                   | Feasibility and Acceptability                                    | 70                 |
| McLaughlin et al., 2011<br>USA<br>LIFE Community | N =14       | 18-29                                              | Social Support               | App                   | Social Support<br>Bridging Social Capitol                        | 85                 |
| Suzuki and Beale, 2006<br>USA                    | N =21       | 13-22<br>Mean age: 19.3±2.4                        | Purpose of Website use       | Website               | Cancer-Related Information Dissemination                         | 50                 |

## Multimedia Appendix 2

| Author (Year)<br>Country<br>Intervention Name           | Sample Size      | Age Range (years)<br>Mean/<br>Median Age (years) | Key Target Behaviour              | Intervention Platform | Outcome Measure(s)                                 | QualSyst Score (%) |
|---------------------------------------------------------|------------------|--------------------------------------------------|-----------------------------------|-----------------------|----------------------------------------------------|--------------------|
|                                                         |                  |                                                  |                                   |                       | Interpersonal Connection                           |                    |
| Wu et al., 2011<br><br>USA<br>ESRA-CAF                  | N =40            | 13-20                                            | Monitoring Symptoms               | Website               | Completion Rates                                   | 73                 |
| <b>Platform Development</b>                             |                  |                                                  |                                   |                       |                                                    |                    |
| Phelps et al., 2016<br><br>Not Reported<br>C:EVOLVE     | N =12            | 15-23                                            | VR Counselling System Development | VR                    | System Development<br><br>System Pilot             | 55                 |
| Winterling et al., 2017<br><br>Sweden<br>Fex-Can        | N =13            | 20-41                                            | Website Development               | Website               | Co-Design Success                                  | 60                 |
| <b>Qualitative Studies</b>                              |                  |                                                  |                                   |                       |                                                    |                    |
| Donovan et al., 2014<br><br>USA<br>Not Reported         | N = Not Reported | 15-39                                            | Social Support                    | Website               | Types of Social Support                            | 70                 |
| Gonzalez-Morkos et al., 2014<br><br>USA<br>TI Webcast   | N =6             | 15-18                                            | Social Therapy                    | Live Webcasting       | User Experience and Satisfaction                   | 70                 |
| Griffiths et al., 2015<br><br>Not Reported<br>Realshare | N =12            | 16-30<br><br>Mean 21.08±4.15                     | Website Development and Usage     | Website               | Experience of Using Realshare<br><br>Acceptability | 45                 |

## Multimedia Appendix 2

| Author (Year)<br>Country<br>Intervention Name                                  | Sample Size | Age Range (years)<br>Mean/<br>Median Age (years) | Key Target Behaviour | Intervention Platform | Outcome Measure(s)                                                                            | QualSyst Score (%) |
|--------------------------------------------------------------------------------|-------------|--------------------------------------------------|----------------------|-----------------------|-----------------------------------------------------------------------------------------------|--------------------|
| Stinson et al., 2015a<br>Canada<br>Teens Taking Charge: Managing Cancer Online | N =22       | 12-18<br>Mean age: 15.2±1.8                      | Self-management      | Website               | User Satisfaction<br>Design<br>Content<br>Functionality and Features<br>Sociability<br>Desire | 75                 |
| <b>Mixed-Methods Studies</b>                                                   |             |                                                  |                      |                       |                                                                                               |                    |
| Ameringer et al., 2015<br>Not Reported<br>mOST                                 | N =72       | 13-29<br>Mean age: 18.5                          | Symptom Management   | App                   | Symptoms<br>Symptom Clusters                                                                  | 95                 |

*Note.* SD = Standard Deviation, I = Intervention Group, C = Control Group, BMI – Body Mass Index, VR = Virtual Reality, CD-ROM = Compact Disc Read-Only Memory, PTSD = Post-Traumatic Stress Disorder
