# Supplementary material for: Digital Interventions to Support Adolescents and Young Adults With Cancer: Systematic Review
Source: PubMed Central journal article supplement (PMC6693302; doi:10.2196/12071), 2019-07-31
Supplement: cancer_v5i2e12071_app3.pdf [file cancer_v5i2e12071_app3.pdf]

**QualSyst Scores for Qualitative Papers**

| <b>Author<br/>Year</b>        | <b>QualSyst Criteria (Qualitative)</b>     |                                      |                             |                                                                |                                                     |                                                          |                                                        |                                                         |                                      |                            | <b>Score<br/>(%)</b> |
|-------------------------------|--------------------------------------------|--------------------------------------|-----------------------------|----------------------------------------------------------------|-----------------------------------------------------|----------------------------------------------------------|--------------------------------------------------------|---------------------------------------------------------|--------------------------------------|----------------------------|----------------------|
|                               | Question/ Objective sufficiently described | Study design evident and appropriate | Context for the study clear | Connection to a theoretical framework/ wider body of knowledge | Sampling strategy described, relevant and justified | Data collection methods clearly described and systematic | Data analysis methods clearly described and systematic | Use of verification procedures to establish credibility | Conclusions supported by the results | Reflexivity of the account |                      |
| Ameringer et al. (2015)       | 2                                          | 2                                    | 2                           | 2                                                              | 2                                                   | 2                                                        | 2                                                      | 2                                                       | 2                                    | 2                          | 100                  |
| Cantrell & Conte (2008)       | 1                                          | 0                                    | 2                           | 2                                                              | 0                                                   | 0                                                        | 0                                                      | 0                                                       | 1                                    | 1                          | 35                   |
| Donovan et al. (2014)         | 2                                          | 2                                    | 2                           | 2                                                              | 1                                                   | 2                                                        | 1                                                      | 0                                                       | 2                                    | 0                          | 70                   |
| Gonzalez-Morkos et al. (2014) | 2                                          | 2                                    | 2                           | 1                                                              | 2                                                   | 1                                                        | 1                                                      | 0                                                       | 2                                    | 1                          | 70                   |
| Griffiths et al. (2015)       | 0                                          | 1                                    | 1                           | 1                                                              | 1                                                   | 1                                                        | 1                                                      | 1                                                       | 1                                    | 1                          | 45                   |
| Kunin-Batson et al. (2016)    | 2                                          | 2                                    | 2                           | 1                                                              | 1                                                   | 2                                                        | 1                                                      | 0                                                       | 2                                    | 0                          | 65                   |
| Lai et al. (2015)             | 2                                          | 2                                    | 2                           | 2                                                              | 2                                                   | 2                                                        | 2                                                      | 0                                                       | 1                                    | 1                          | 80                   |

Multimedia Appendix 3

| Author<br>Year           | QualSyst Criteria (Qualitative)            |                                      |                             |                                                                |                                                     |                                                          |                                                        |                                                         |                                      |                            | Score<br>(%) |
|--------------------------|--------------------------------------------|--------------------------------------|-----------------------------|----------------------------------------------------------------|-----------------------------------------------------|----------------------------------------------------------|--------------------------------------------------------|---------------------------------------------------------|--------------------------------------|----------------------------|--------------|
|                          | Question/ Objective sufficiently described | Study design evident and appropriate | Context for the study clear | Connection to a theoretical framework/ wider body of knowledge | Sampling strategy described, relevant and justified | Data collection methods clearly described and systematic | Data analysis methods clearly described and systematic | Use of verification procedures to establish credibility | Conclusions supported by the results | Reflexivity of the account |              |
| MacPherson et al. (2014) | 2                                          | 2                                    | 2                           | 1                                                              | 2                                                   | 2                                                        | 1                                                      | 0                                                       | 2                                    | 0                          | 70           |
| Maurice-Stam (2014)      | 2                                          | 2                                    | 2                           | 1                                                              | 1                                                   | 2                                                        | 1                                                      | 0                                                       | 2                                    | 0                          | 65           |
| Stinson et al. (2013)    | 2                                          | 2                                    | 2                           | 2                                                              | 0                                                   | 2                                                        | 2                                                      | 2                                                       | 2                                    | 0                          | 80           |
| Stinson et al. (2015a)   | 2                                          | 2                                    | 2                           | 2                                                              | 0                                                   | 2                                                        | 2                                                      | 1                                                       | 2                                    | 0                          | 75           |
| Suzuki & Beale (2006)    | 2                                          | 1                                    | 2                           | 1                                                              | 1                                                   | 1                                                        | 1                                                      | 0                                                       | 1                                    | 0                          | 50           |
| Winterling et al. (2016) | 2                                          | 2                                    | 2                           | 2                                                              | 1                                                   | 1                                                        | 0                                                      | 0                                                       | 1                                    | 1                          | 60           |
| Phelps et al. (2016)     | 2                                          | 2                                    | 2                           | 1                                                              | 1                                                   | 1                                                        | 0                                                      | 0                                                       | 2                                    | 1                          | 55           |

Note. Criteria were scored either 2,1 or 0 (2=yes, 1=partial, 0=no) or if the criteria was not applicable to the paper it was scored N/A. To make them comparative, overall scores are presented as a %.
