# Supplementary material for: Digital Interventions to Support Adolescents and Young Adults With Cancer: Systematic Review
Source: PubMed Central journal article supplement (PMC6693302; doi:10.2196/12071), 2019-07-31
Supplement: cancer_v5i2e12071_app4.pdf [file cancer_v5i2e12071_app4.pdf]

**QualSyst Scores for Quantitative Papers**

| Author Date               | QualSyst Criteria (Quantitative)           |                                      |                                                                                                                  |                                               |                                                                         |                                                                                |                                                                           |                                                                                                                                              |                         |                                                       |                                                            |                            |                                       |                                      | Score (%) |
|---------------------------|--------------------------------------------|--------------------------------------|------------------------------------------------------------------------------------------------------------------|-----------------------------------------------|-------------------------------------------------------------------------|--------------------------------------------------------------------------------|---------------------------------------------------------------------------|----------------------------------------------------------------------------------------------------------------------------------------------|-------------------------|-------------------------------------------------------|------------------------------------------------------------|----------------------------|---------------------------------------|--------------------------------------|-----------|
|                           | Question/ Objective sufficiently described | Study design evident and appropriate | Method of subject/ comparison group selection or source of information/ input variable described and appropriate | Subject characteristic sufficiently described | If interventional and random allocation was possible, was it described? | If interventional and blinding of investigators was possible, was it reported? | If interventional and blinding of subjects was possible, was it reported? | Outcomes and (if applicable) exposure measures well defined and robust to measurement/ misclassification bias? Means of assessment reported? | Sample size appropriate | Analytic methods described/ justified and appropriate | Some estimate of variance is reported for the main results | Controlled for confounding | Results reported in sufficient detail | Conclusions supported by the results |           |
| Akard et al. (2015)       | 2                                          | 2                                    | 2                                                                                                                | 2                                             | 2                                                                       | 0                                                                              | N/A                                                                       | 2                                                                                                                                            | 1                       | 2                                                     | 2                                                          | 0                          | 2                                     | 2                                    | 81        |
| Ameringer et al. (2015)   | 2                                          | 2                                    | 2                                                                                                                | 2                                             | N/A                                                                     | N/A                                                                            | N/A                                                                       | 2                                                                                                                                            | 2                       | 2                                                     | 2                                                          | 0                          | 2                                     | 2                                    | 91        |
| Baggott et al. (2012)     | 2                                          | 2                                    | 2                                                                                                                | 2                                             | N/A                                                                     | N/A                                                                            | N/A                                                                       | 2                                                                                                                                            | 1                       | 2                                                     | N/A                                                        | N/A                        | 2                                     | 2                                    | 94        |
| Beale et al. (2007)       | 2                                          | 2                                    | 2                                                                                                                | 2                                             | 0                                                                       | 0                                                                              | N/A                                                                       | 2                                                                                                                                            | 2                       | 2                                                     | 2                                                          | 1                          | 2                                     | 2                                    | 81        |
| Berg et al. (2014)        | 2                                          | 2                                    | 2                                                                                                                | 2                                             | N/A                                                                     | N/A                                                                            | N/A                                                                       | 2                                                                                                                                            | 1                       | 2                                                     | 0                                                          | 0                          | 2                                     | 2                                    | 77        |
| Blaauwbroek et al. (2012) | 2                                          | 2                                    | 2                                                                                                                | 2                                             | 0                                                                       | 0                                                                              | N/A                                                                       | 2                                                                                                                                            | 1                       | 2                                                     | 1                                                          | 0                          | 2                                     | 2                                    | 64        |
| Burns et al. (2009)       | 2                                          | 2                                    | 2                                                                                                                | 2                                             | 2                                                                       | 0                                                                              | N/A                                                                       | 2                                                                                                                                            | 1                       | 2                                                     | 1                                                          | 1                          | 2                                     | 2                                    | 73        |

Multimedia Appendix 4

| Author Date           | QualSyst Criteria (Quantitative)           |                                      |                                                                                                                  |                                               |                                                                         |                                                                                |                                                                           |                                                                                                                                              |                         |                                                       |                                                            |                            |                                       |                                      | Score (%) |
|-----------------------|--------------------------------------------|--------------------------------------|------------------------------------------------------------------------------------------------------------------|-----------------------------------------------|-------------------------------------------------------------------------|--------------------------------------------------------------------------------|---------------------------------------------------------------------------|----------------------------------------------------------------------------------------------------------------------------------------------|-------------------------|-------------------------------------------------------|------------------------------------------------------------|----------------------------|---------------------------------------|--------------------------------------|-----------|
|                       | Question/ Objective sufficiently described | Study design evident and appropriate | Method of subject/ comparison group selection or source of information/ input variable described and appropriate | Subject characteristic sufficiently described | If interventional and random allocation was possible, was it described? | If interventional and blinding of investigators was possible, was it reported? | If interventional and blinding of subjects was possible, was it reported? | Outcomes and (if applicable) exposure measures well defined and robust to measurement/ misclassification bias? Means of assessment reported? | Sample size appropriate | Analytic methods described/ justified and appropriate | Some estimate of variance is reported for the main results | Controlled for confounding | Results reported in sufficient detail | Conclusions supported by the results |           |
| Emmons et al. (2013)  | 2                                          | 2                                    | 2                                                                                                                | 2                                             | 2                                                                       | 0                                                                              | N/A                                                                       | 2                                                                                                                                            | 2                       | 2                                                     | 2                                                          | 2                          | 2                                     | 2                                    | 92        |
| Gilliam et al. (2011) | 2                                          | 2                                    | 2                                                                                                                | 2                                             | N/A                                                                     | N/A                                                                            | N/A                                                                       | 2                                                                                                                                            | 0                       | 2                                                     | 0                                                          | 0                          | 2                                     | 2                                    | 73        |
| Hardy et al. (2011)   | 2                                          | 1                                    | 1                                                                                                                | 1                                             | N/A                                                                     | N/A                                                                            | N/A                                                                       | 2                                                                                                                                            | 0                       | 2                                                     | 0                                                          | 0                          | 1                                     | 1                                    | 50        |
| Hooke et al. (2016)   | 2                                          | 2                                    | 2                                                                                                                | 2                                             | 0                                                                       | 0                                                                              | N/A                                                                       | 2                                                                                                                                            | 1                       | 2                                                     | 0                                                          | 0                          | 2                                     | 2                                    | 68        |
| Huang et al. (2014)   | 2                                          | 2                                    | 2                                                                                                                | 2                                             | 2                                                                       | N/A                                                                            | N/A                                                                       | 2                                                                                                                                            | 1                       | 1                                                     | 0                                                          | 1                          | 2                                     | 2                                    | 79        |
| Jibb et al. (2017)    | 2                                          | 2                                    | 2                                                                                                                | 2                                             | N/A                                                                     | N/A                                                                            | N/A                                                                       | 2                                                                                                                                            | 2                       | 2                                                     | 0                                                          | 0                          | 2                                     | 2                                    | 82        |
| Jones et al. (2010)   | 2                                          | 2                                    | 2                                                                                                                | 2                                             | 1                                                                       | 0                                                                              | N/A                                                                       | 2                                                                                                                                            | 1                       | 2                                                     | 0                                                          | 0                          | 2                                     | 2                                    | 69        |
| Kato et al. (2008)    | 2                                          | 2                                    | 2                                                                                                                | 2                                             | 2                                                                       | 2                                                                              | N/A                                                                       | 2                                                                                                                                            | 2                       | 2                                                     | 2                                                          | 2                          | 2                                     | 2                                    | 100       |

Multimedia Appendix 4

| Author Date               | QualSyst Criteria (Quantitative)           |                                      |                                                                                                                  |                                               |                                                                         |                                                                                |                                                                           |                                                                                                                                              |                         |                                                       |                                                            |                            |                                       |                                      | Score (%) |
|---------------------------|--------------------------------------------|--------------------------------------|------------------------------------------------------------------------------------------------------------------|-----------------------------------------------|-------------------------------------------------------------------------|--------------------------------------------------------------------------------|---------------------------------------------------------------------------|----------------------------------------------------------------------------------------------------------------------------------------------|-------------------------|-------------------------------------------------------|------------------------------------------------------------|----------------------------|---------------------------------------|--------------------------------------|-----------|
|                           | Question/ Objective sufficiently described | Study design evident and appropriate | Method of subject/ comparison group selection or source of information/ input variable described and appropriate | Subject characteristic sufficiently described | If interventional and random allocation was possible, was it described? | If interventional and blinding of investigators was possible, was it reported? | If interventional and blinding of subjects was possible, was it reported? | Outcomes and (if applicable) exposure measures well defined and robust to measurement/ misclassification bias? Means of assessment reported? | Sample size appropriate | Analytic methods described/ justified and appropriate | Some estimate of variance is reported for the main results | Controlled for confounding | Results reported in sufficient detail | Conclusions supported by the results |           |
| Kesler et al. (2011)      | 1                                          | 1                                    | 2                                                                                                                | 2                                             | N/A                                                                     | N/A                                                                            | N/A                                                                       | 2                                                                                                                                            | 0                       | 2                                                     | 1                                                          | 2                          | 2                                     | 2                                    | 77        |
| Knijnenburg et al. (2012) | 2                                          | 1                                    | N/A                                                                                                              | 2                                             | N/A                                                                     | N/A                                                                            | N/A                                                                       | 1                                                                                                                                            | 1                       | 2                                                     | 1                                                          | 0                          | 1                                     | 1                                    | 60        |
| McLaughlin et al. (2012)  | 2                                          | 2                                    | 2                                                                                                                | 2                                             | N/A                                                                     | N/A                                                                            | N/A                                                                       | 2                                                                                                                                            | 1                       | 2                                                     | 0                                                          | N/A                        | 2                                     | 2                                    | 85        |
| Mendoza (2017)            | 1                                          | 2                                    | 2                                                                                                                | 2                                             | 0                                                                       | 0                                                                              | N/A                                                                       | 2                                                                                                                                            | 2                       | 2                                                     | 0                                                          | 0                          | 2                                     | 1                                    | 62        |
| Rabin et al. (2011)       | 2                                          | 2                                    | 1                                                                                                                | 1                                             | 0                                                                       | N/A                                                                            | N/A                                                                       | 1                                                                                                                                            | 1                       | 2                                                     | 0                                                          | 0                          | 1                                     | 2                                    | 46        |
| Rodgers et al. (2014)     | 2                                          | 2                                    | 2                                                                                                                | 1                                             | N/A                                                                     | N/A                                                                            | N/A                                                                       | 1                                                                                                                                            | 0                       | 2                                                     | 0                                                          | 0                          | 1                                     | 1                                    | 43        |
| Sabel et al. (2016)       | 2                                          | 2                                    | 2                                                                                                                | 2                                             | 2                                                                       | 2                                                                              | N/A                                                                       | 2                                                                                                                                            | 1                       | 2                                                     | 2                                                          | 2                          | 2                                     | 2                                    | 96        |
| Seitz et al. (2014a)      | 2                                          | 2                                    | 2                                                                                                                | 2                                             | 1                                                                       | 0                                                                              | N/A                                                                       | 2                                                                                                                                            | 1                       | 2                                                     | 2                                                          | 2                          | 2                                     | 2                                    | 85        |

Multimedia Appendix 4

| Author Date             | QualSyst Criteria (Quantitative)           |                                      |                                                                                                                  |                                               |                                                                         |                                                                                |                                                                           |                                                                                                                                              |                         |                                                       |                                                            |                            |                                       |                                      | Score (%) |
|-------------------------|--------------------------------------------|--------------------------------------|------------------------------------------------------------------------------------------------------------------|-----------------------------------------------|-------------------------------------------------------------------------|--------------------------------------------------------------------------------|---------------------------------------------------------------------------|----------------------------------------------------------------------------------------------------------------------------------------------|-------------------------|-------------------------------------------------------|------------------------------------------------------------|----------------------------|---------------------------------------|--------------------------------------|-----------|
|                         | Question/ Objective sufficiently described | Study design evident and appropriate | Method of subject/ comparison group selection or source of information/ input variable described and appropriate | Subject characteristic sufficiently described | If interventional and random allocation was possible, was it described? | If interventional and blinding of investigators was possible, was it reported? | If interventional and blinding of subjects was possible, was it reported? | Outcomes and (if applicable) exposure measures well defined and robust to measurement/ misclassification bias? Means of assessment reported? | Sample size appropriate | Analytic methods described/ justified and appropriate | Some estimate of variance is reported for the main results | Controlled for confounding | Results reported in sufficient detail | Conclusions supported by the results |           |
| Seitz et al. (2014b)    | 2                                          | 2                                    | 2                                                                                                                | 2                                             | 1                                                                       | 0                                                                              | N/A                                                                       | 2                                                                                                                                            | 1                       | 2                                                     | 2                                                          | 2                          | 2                                     | 2                                    | 85        |
| Stinson et al. (2015b)  | 2                                          | 2                                    | 2                                                                                                                | 2                                             | 2                                                                       | 2                                                                              | N/A                                                                       | 2                                                                                                                                            | 2                       | 2                                                     | 2                                                          | 2                          | 2                                     | 2                                    | 100       |
| Valle et al. (2013)     | 2                                          | 2                                    | 2                                                                                                                | 2                                             | 2                                                                       | N/A                                                                            | N/A                                                                       | 2                                                                                                                                            | 1                       | 2                                                     | 0                                                          | 0                          | 2                                     | 2                                    | 68        |
| Valle et al. (2015a)    | 2                                          | 2                                    | 2                                                                                                                | 1                                             | 1                                                                       | N/A                                                                            | N/A                                                                       | 1                                                                                                                                            | 1                       | 2                                                     | 0                                                          | 0                          | 2                                     | 2                                    | 58        |
| Wiklander et al. (2017) | 2                                          | 2                                    | N/A                                                                                                              | 2                                             | N/A                                                                     | N/A                                                                            | N/A                                                                       | 2                                                                                                                                            | 1                       | 2                                                     | 1                                                          | 0                          | 2                                     | 2                                    | 80        |
| Wint et al. (2002)      | 2                                          | 2                                    | 1                                                                                                                | 2                                             | 0                                                                       | N/A                                                                            | N/A                                                                       | 1                                                                                                                                            | 2                       | 2                                                     | 2                                                          | 0                          | 1                                     | 2                                    | 71        |
| Wu et al. (2011)        | 2                                          | 2                                    | 1                                                                                                                | 2                                             | N/A                                                                     | N/A                                                                            | N/A                                                                       | 2                                                                                                                                            | 2                       | 2                                                     | 0                                                          | N/A                        | 1                                     | 2                                    | 73        |

Note. Criteria were scored either 2,1 or 0 (2=yes, 1=partial, 0=no) or if the criteria was not applicable to the paper it was scored N/A. To make them comparative, overall scores are presented as a %.
