# Supplementary material for: Digital Interventions to Support Adolescents and Young Adults With Cancer: Systematic Review
Source: PubMed Central journal article supplement (PMC6693302; doi:10.2196/12071), 2019-07-31
Supplement: cancer_v5i2e12071_app5.pdf [file cancer_v5i2e12071_app5.pdf]

## Multimedia Appendix 5

|                                                                                                          | Automated Functions                                 |                                                                        |                                 | Communicative Functions                                                                                            |                                                                          |                                                                             | Supplementary Modes of Communication                    |              |                                  |           |                      |          |
|----------------------------------------------------------------------------------------------------------|-----------------------------------------------------|------------------------------------------------------------------------|---------------------------------|--------------------------------------------------------------------------------------------------------------------|--------------------------------------------------------------------------|-----------------------------------------------------------------------------|---------------------------------------------------------|--------------|----------------------------------|-----------|----------------------|----------|
|                                                                                                          | Instinctive functions embedded within the programme |                                                                        |                                 | Functions which provide the opportunity for connection or communication with another person                        |                                                                          |                                                                             | Additional modes of delivering the intervention content |              |                                  |           |                      |          |
| Author, Year of Publication<br>Intervention Name                                                         | a) The use of an enriched information environment   | b) Automated tailored feedback based on individual progress monitoring | c) Automated follow up messages | a) Access to an advisor to request advice (e.g. 'ask the expert facility', expert led discussion, or chat session. | b) Scheduled contact with advisor (e.g. appointment or scheduled emails) | c) peer-to-peer access (e.g. buddy systems, peer-to-peer discussion boards) | a) email                                                | b) telephone | c) short messaging service (SMS) | d) CD-ROM | e) videoconferencing | f) Other |
| * No identifiable mode of delivery as per these criteria identifiable from text description in paper     |                                                     |                                                                        |                                 |                                                                                                                    |                                                                          |                                                                             |                                                         |              |                                  |           |                      |          |
| Winterling et al., 2016<br>Fex-Can                                                                       |                                                     |                                                                        |                                 |                                                                                                                    |                                                                          |                                                                             |                                                         |              |                                  |           |                      |          |
| Wu et al., 2012*<br>Electronic Self-report Assessment Cancer (ESRA-C)                                    |                                                     |                                                                        |                                 |                                                                                                                    |                                                                          |                                                                             |                                                         |              |                                  |           |                      |          |
| <b>Mobile Applications</b>                                                                               |                                                     |                                                                        |                                 |                                                                                                                    |                                                                          |                                                                             |                                                         |              |                                  |           |                      |          |
| Baggott et al., 2012<br>mOST                                                                             |                                                     |                                                                        |                                 |                                                                                                                    |                                                                          |                                                                             |                                                         |              |                                  |           |                      |          |
| Macpherson et al., 2014; Ameringer et al., 2015<br>C-SCAT                                                |                                                     |                                                                        |                                 |                                                                                                                    |                                                                          |                                                                             |                                                         |              |                                  |           |                      |          |
| Rodgers et al., 2013 & Rodgers et al., 2014<br>EAT!                                                      |                                                     |                                                                        |                                 |                                                                                                                    |                                                                          |                                                                             |                                                         |              |                                  |           |                      |          |
| Jibb et al., 2017<br>PainSquad+                                                                          |                                                     |                                                                        |                                 |                                                                                                                    |                                                                          |                                                                             |                                                         |              |                                  |           |                      |          |
| Stinson et al., 2013; Stinson et al., 2015a; Stinson et al., 2015b<br>Pain Squad                         |                                                     |                                                                        |                                 |                                                                                                                    |                                                                          |                                                                             |                                                         |              |                                  |           |                      |          |
| <b>Other (Social Media, PC game, video, CD-ROM, Wearable, Virtual Reality, Computer Program, e-Mail)</b> |                                                     |                                                                        |                                 |                                                                                                                    |                                                                          |                                                                             |                                                         |              |                                  |           |                      |          |
